# Supplementary material
Source: publisher figshare collection journal article supplement (https://rs.figshare.com/ndownloader/files/16106963)
Supplement: Supplementary file 1 [file 16106963]

# Supplementary Material

## **Symbionts of the ciliate *Euplotes*: diversity, patterns, and potential as models for bacteria-eukaryote endosymbioses**

Vittorio Boscaro, Filip Husnik, Claudia Vannini, Patrick J. Keeling

*Proceedings of the Royal Society B: Biological Sciences*

doi: 10.1098/rspb.2019.0693

**Table S1. List of *Euplotes* strains and populations analyzed in this paper.**

| Name      | Type of culture   | Species                       | Clade | Reference        | 18S rRNA gene sequence | Environment             | Geographic origin         | Metagenomic screening? | New FISH performed?                                |
|-----------|-------------------|-------------------------------|-------|------------------|------------------------|-------------------------|---------------------------|------------------------|----------------------------------------------------|
| Eae1      | Monoclonal strain | <i>E. aediculatus</i>         | B     | [17]             | LT623907               | Freshwater              | Tuscany (Italy)           | YES                    | YES                                                |
| Eae2      | Monoclonal strain | <i>E. aediculatus</i>         | B     | [17]             | LT623908               | Freshwater              | Tuscany (Italy)           | YES                    | *                                                  |
| Eae3      | Monoclonal strain | <i>E. aediculatus</i>         | B     | [17]             | LT623904               | Freshwater              | Tuscany (Italy)           | YES                    | *                                                  |
| Eae4      | Monoclonal strain | <i>E. aediculatus</i>         | B     | This publication | LR588889               | Freshwater              | Tuscany (Italy)           | YES                    | YES                                                |
| Eae5      | Monoclonal strain | <i>E. aediculatus</i>         | B     | [17]             | LT623902               | Freshwater              | Tuscany (Italy)           | YES                    | *                                                  |
| Eae6      | Monoclonal strain | <i>E. aediculatus</i>         | B     | This publication | LR588890               | Freshwater              | Tuscany (Italy)           | YES                    | YES                                                |
| Eda1      | Monoclonal strain | <i>E. daidaleos</i>           | B     | [17]             | LT623903               | Freshwater              | Tuscany (Italy)           | YES                    | YES                                                |
| EM        | Population        | <i>E. eurytomus</i>           | B     | [14]             | FR873717               | Freshwater              | Lazio (Italy)             | YES                    | <b>NO</b>                                          |
| Eoc1/2    | Population        | <i>E. octocarinatus</i>       | B     | [17]             | LT623905               | Freshwater              | Tuscany (Italy)           | YES                    | YES                                                |
| FL(12)-VI | Monoclonal strain | <i>E. octocarinatus</i>       | B     | [14]             | N/A                    | N/A                     | Florida (USA)             | YES                    | <b>NO</b>                                          |
| Ewo1      | Monoclonal strain | <i>E. woodruffi</i>           | B     | [17]             | LT623906               | Freshwater              | Tuscany (Italy)           | YES                    | YES                                                |
| POH1      | Monoclonal strain | <i>E. woodruffi</i>           | B     | [14]             | FR873715               | Brackish (low salinity) | Hawaii (USA)              | YES                    | <b>NO</b>                                          |
| EMP       | Population        | <i>Euplotes</i> sp.           | B     | [14]             | FR873720               | Freshwater              | Lazio (Italy)             | <b>NO</b>              | YES (based on Sanger-sequenced 16S rRNA amplicons) |
| Fsp1.4    | Monoclonal strain | <i>E. platystoma</i> (=harpa) | B     | [13]             | AJ811015               | Brackish (low salinity) | Tuscany (Italy)           | YES                    | *                                                  |
| Na2       | Monoclonal strain | <i>E. platystoma</i> (=harpa) | B     | [18]             | LT898465               | Brackish (low salinity) | Campania (Italy)          | YES                    | *                                                  |
| LIV5      | Monoclonal strain | <i>E. magnicirratu</i>        | A     | [25]             | AJ549209               | Marine                  | Ligurian Sea (Italy)      | YES                    | YES                                                |
| MaS2      | Monoclonal strain | <i>E. enigma</i>              | A     | [10]             | LT732572               | Marine                  | British Columbia (Canada) | <b>NO</b>              | <b>NO</b>                                          |

\* No new FISH experiment required

Table S2. List of detected bacterial symbionts in the *Euplotes* strains and populations analyzed in this paper. Novel taxa are in bold.

| Host                                    | Symbiont                                                                                                                                                   | Classification                                                                                                                                                                                                                                                                                                                   | 16S rRNA gene sequence                       | Reference                                                        | Tested FISH probe                                                  | FISH probe sequence                                                                   | Known hosts                                                                                                                                                                                                                                                                                                                                                                                                                                                                                                                  |
|-----------------------------------------|------------------------------------------------------------------------------------------------------------------------------------------------------------|----------------------------------------------------------------------------------------------------------------------------------------------------------------------------------------------------------------------------------------------------------------------------------------------------------------------------------|----------------------------------------------|------------------------------------------------------------------|--------------------------------------------------------------------|---------------------------------------------------------------------------------------|------------------------------------------------------------------------------------------------------------------------------------------------------------------------------------------------------------------------------------------------------------------------------------------------------------------------------------------------------------------------------------------------------------------------------------------------------------------------------------------------------------------------------|
| Eae1 ( <i>E. aediculatus</i> )          | <i>Polynucleobacter</i> sp.<br>"Ca. <i>Nebulobacter yamunensis</i> "                                                                                       | <i>Betaproteobacteria</i> , <i>Burkholderiales</i> , <i>Burkholderiaceae</i><br><i>Gammaproteobacteria</i> , <i>Thiotrichales</i> , <i>Fastidiosibacteraceae</i>                                                                                                                                                                 | LT615228 (genome)<br>LR585330                | [17]<br>This publication                                         | Poly_862 [13]<br>NebProb203 [21]                                   | 5'-GGCTGACTTCACGGCTTA-3'<br>5'-ATAGCGACTGCCCTAAAG-3'                                  | Most <i>Euplotes</i> species in clade B [14]<br><i>E. aediculatus</i> [21, this publication]                                                                                                                                                                                                                                                                                                                                                                                                                                 |
| Eae2 ( <i>E. aediculatus</i> )          | "Ca. <i>Cyrtobacter zanobii</i> "                                                                                                                          | <i>Alphaproteobacteria</i> , <i>Rickettsiales</i> , "Ca. <i>Midichloriaceae</i> "                                                                                                                                                                                                                                                | LR585331                                     | This publication                                                 | Cyrii_142 [22]                                                     | 5'-CGTTTCCAATAGTATTTTGGTAC-3'                                                         | <i>E. aediculatus</i> [22, this publication]                                                                                                                                                                                                                                                                                                                                                                                                                                                                                 |
| Eae3 ( <i>E. aediculatus</i> )          | <i>Polynucleobacter</i> sp.                                                                                                                                | <i>Betaproteobacteria</i> , <i>Burkholderiales</i> , <i>Burkholderiaceae</i>                                                                                                                                                                                                                                                     | LT606947 (genome)                            | [17]                                                             | Poly_862 [13]                                                      | 5'-GGCTGACTTCACGGCTTA-3'                                                              | Most <i>Euplotes</i> species in clade B [14]                                                                                                                                                                                                                                                                                                                                                                                                                                                                                 |
| Eae4 ( <i>E. aediculatus</i> )          | <i>Polynucleobacter</i> sp.                                                                                                                                | <i>Betaproteobacteria</i> , <i>Burkholderiales</i> , <i>Burkholderiaceae</i>                                                                                                                                                                                                                                                     | LT606948 (genome)                            | [17]                                                             | Poly_862 [13]                                                      | 5'-GGCTGACTTCACGGCTTA-3'                                                              | Most <i>Euplotes</i> species in clade B [14]                                                                                                                                                                                                                                                                                                                                                                                                                                                                                 |
| Eae5 ( <i>E. aediculatus</i> )          | <i>Polynucleobacter</i> sp.                                                                                                                                | <i>Betaproteobacteria</i> , <i>Burkholderiales</i> , <i>Burkholderiaceae</i>                                                                                                                                                                                                                                                     | LT606950 (genome)                            | [17]                                                             | Poly_862 [13]                                                      | 5'-GGCTGACTTCACGGCTTA-3'                                                              | Most <i>Euplotes</i> species in clade B [14]                                                                                                                                                                                                                                                                                                                                                                                                                                                                                 |
| Eae6 ( <i>E. aediculatus</i> )          | "Ca. <i>Protistobacter heckmanni</i> "<br>"Ca. <i>Nebulobacter yamunensis</i> "<br>"Ca. <i>Cyrtobacter zanobii</i> "                                       | <i>Betaproteobacteria</i> , <i>Burkholderiales</i> , <i>Burkholderiaceae</i><br><i>Gammaproteobacteria</i> , <i>Thiotrichales</i> , <i>Fastidiosibacteraceae</i><br><i>Alphaproteobacteria</i> , <i>Rickettsiales</i> , "Ca. <i>Midichloriaceae</i> "                                                                            | LR585335<br>LR585334<br>LR585333             | This publication<br>NebProb203 [21]<br>This publication          | Proti_445 [14]<br>Cyrin_142 [22]                                   | 5'-ACCGAGATCGTTTGGTTC-3'<br>5'-ATAGCGACTGCCCTAAAG-3'<br>5'-CGTTTCCAATAGTATTTTGGTAC-3' | Several <i>Euplotes</i> species in clade B [14]<br><i>E. aediculatus</i> [21, this publication]<br><i>E. aediculatus</i> [22, this publication]                                                                                                                                                                                                                                                                                                                                                                              |
| Eda1 ( <i>E. doidaleos</i> )            | <i>Polynucleobacter</i> sp.                                                                                                                                | <i>Betaproteobacteria</i> , <i>Burkholderiales</i> , <i>Burkholderiaceae</i>                                                                                                                                                                                                                                                     | LT606946 (genome)                            | [17]                                                             | Poly_862 [13]                                                      | 5'-GGCTGACTTCACGGCTTA-3'                                                              | Most <i>Euplotes</i> species in clade B [14]                                                                                                                                                                                                                                                                                                                                                                                                                                                                                 |
| EM ( <i>E. eurytomus</i> )              | "Ca. <i>Finniella dimorpha</i> " sp. nov.<br>"Ca. <i>Protistobacter heckmanni</i> "<br>"Ca. <i>Megaira polyvenophila</i> "<br>"Ca. <i>Cyrtobacter</i> sp." | <i>Alphaproteobacteria</i> , <i>Holospirales</i> , <i>Paracaulobacteraceae</i><br><i>Betaproteobacteria</i> , <i>Burkholderiales</i> , <i>Burkholderiaceae</i><br><i>Alphaproteobacteria</i> , <i>Rickettsiales</i> , <i>Rickettsiaceae</i><br><i>Alphaproteobacteria</i> , <i>Rickettsiales</i> , "Ca. <i>Midichloriaceae</i> " | LR585336<br>FR873710<br>LR585337<br>LR585338 | This publication<br>[14]<br>This publication<br>This publication | Fin_1025 [This publication]<br>Proti_445 [14]<br>N/A<br>N/A        | 5'-GTGAGCGCCAGCAAACT-3'<br>5'-ACCGAGATCGTTTGGTTC-3'<br>N/A<br>N/A                     | <i>E. doidaleos</i> , <i>E. eurytomus</i> , <i>E. octocarinatus</i> [This publication]<br>Several <i>Euplotes</i> species in clade B [14]<br><i>Ciliates</i> [ <i>Colpidium</i> , <i>Diaphrys</i> , <i>Euplotes</i> , <i>Ichthyophthirius</i> , <i>Paramecium</i> , <i>Spirostomum</i> ], green algae [ <i>Carteria</i> , <i>Mesostigma</i> , <i>Pleodorina</i> , <i>Volvox</i> ], diatoms [ <i>Hyalodiscus</i> ] [42]<br><i>E. eurytomus</i> [This publication]                                                             |
| Eoc1/2 ( <i>E. octocarinatus</i> )      | "Ca. <i>Finniella dimorpha</i> " sp. nov.<br>"Ca. <i>Endonucleobacter</i> sp."                                                                             | <i>Alphaproteobacteria</i> , <i>Holospirales</i> , <i>Paracaulobacteraceae</i><br><i>Gammaproteobacteria</i>                                                                                                                                                                                                                     | LR585339<br>LR585340                         | This publication<br>This publication                             | N/A<br>N/A                                                         | N/A<br>N/A                                                                            | <i>E. doidaleos</i> , <i>E. eurytomus</i> , <i>E. octocarinatus</i> [This publication]<br>The species "Ca. <i>Endonucleobacter rarus</i> " has been found in the opisthokont <i>Nuclearia</i> [43]                                                                                                                                                                                                                                                                                                                           |
|                                         | <i>Polynucleobacter</i> sp.                                                                                                                                | <i>Betaproteobacteria</i> , <i>Burkholderiales</i> , <i>Burkholderiaceae</i>                                                                                                                                                                                                                                                     | LT606951 (genome)                            | [17]                                                             | Poly_862 [13] PnevC-165-445 [63]                                   | 5'-GGCTGACTTCACGGCTTA-3', 5'-GAGCCGGTGTTCCTCC-3'                                      | Most <i>Euplotes</i> species in clade B [14]                                                                                                                                                                                                                                                                                                                                                                                                                                                                                 |
|                                         | "Ca. <i>Fujishimia apicalis</i> " gen. nov., sp. nov.<br>"Ca. <i>Finniella dimorpha</i> " sp. nov.                                                         | <i>Alphaproteobacteria</i> , <i>Holospirales</i> , <i>Paracaulobacteraceae</i><br><i>Alphaproteobacteria</i> , <i>Holospirales</i> , <i>Paracaulobacteraceae</i>                                                                                                                                                                 | LR585344<br>LR585345                         | This publication<br>This publication                             | Fuji_838 [This publication]<br>N/A                                 | 5'-GCTCTCTAAAGAGTGC-3'<br>N/A                                                         | <i>E. octocarinatus</i> [This publication]<br><i>E. doidaleos</i> , <i>E. eurytomus</i> , <i>E. octocarinatus</i> [This publication]                                                                                                                                                                                                                                                                                                                                                                                         |
|                                         | "Ca. <i>Megaira polyvenophila</i> "<br>"Ca. <i>Anaellobacter sociabilis</i> " sp. nov.                                                                     | <i>Alphaproteobacteria</i> , <i>Rickettsiales</i> , <i>Rickettsiaceae</i><br><i>Alphaproteobacteria</i> , <i>Rickettsiales</i> , "Ca. <i>Midichloriaceae</i> "                                                                                                                                                                   | LR585341<br>LR585342                         | This publication<br>This publication                             | MegP0436 [23]<br>Ana2_436 [This publication]                       | 5'-TTATCTTTCCAACTAAAG-3'<br>5'-CATTATTTCCTCACTAAAG-3'                                 | <i>Ciliates</i> [ <i>Colpidium</i> , <i>Diaphrys</i> , <i>Euplotes</i> , <i>Ichthyophthirius</i> , <i>Paramecium</i> , <i>Spirostomum</i> ], green algae [ <i>Carteria</i> , <i>Mesostigma</i> , <i>Pleodorina</i> , <i>Volvox</i> ], diatoms [ <i>Hyalodiscus</i> ] [42]<br><i>E. octocarinatus</i> [This publication]                                                                                                                                                                                                      |
|                                         | "Ca. <i>Euplotella sexta</i> " gen. nov., sp. nov.                                                                                                         | <i>Alphaproteobacteria</i> , <i>Rickettsiales</i> , "Ca. <i>Midichloriaceae</i> "                                                                                                                                                                                                                                                | LR585343                                     | This publication                                                 | EocBan_828 [This publication]                                      | 5'-AACCTCGTCCCGACACC-3'                                                               | <i>E. octocarinatus</i> [This publication]                                                                                                                                                                                                                                                                                                                                                                                                                                                                                   |
| FL12)-VI ( <i>E. octocarinatus</i> )    | "Ca. <i>Protistobacter heckmanni</i> "<br>"Ca. <i>Megaira polyvenophila</i> "                                                                              | <i>Betaproteobacteria</i> , <i>Burkholderiales</i> , <i>Burkholderiaceae</i><br><i>Alphaproteobacteria</i> , <i>Rickettsiales</i> , <i>Rickettsiaceae</i>                                                                                                                                                                        | FR873667-9<br>FR823004-7                     | [14]<br>[23]                                                     | Proti_445 [14]<br>MegP0436 [23]                                    | 5'-ACCGAGATCGTTTGGTTC-3'<br>5'-TTATCTTTCCAACTAAAG-3'                                  | Several <i>Euplotes</i> species in clade B [14]<br><i>Ciliates</i> [ <i>Colpidium</i> , <i>Diaphrys</i> , <i>Euplotes</i> , <i>Ichthyophthirius</i> , <i>Paramecium</i> , <i>Spirostomum</i> ], green algae [ <i>Carteria</i> , <i>Mesostigma</i> , <i>Pleodorina</i> , <i>Volvox</i> ], diatoms [ <i>Hyalodiscus</i> ] [42]                                                                                                                                                                                                 |
| Ewo1 ( <i>E. woodruffi</i> )            | <i>Polynucleobacter</i> sp.<br>"Ca. <i>Megaira venefica</i> "                                                                                              | <i>Betaproteobacteria</i> , <i>Burkholderiales</i> , <i>Burkholderiaceae</i><br><i>Alphaproteobacteria</i> , <i>Rickettsiales</i> , <i>Rickettsiaceae</i>                                                                                                                                                                        | LR585346<br>LR585347                         | This publication<br>This publication                             | N/A<br>MegVene95 [43]                                              | N/A<br>5'-CGCTTGCCCACTACGAC-3'                                                        | <i>E. octocarinatus</i> [This publication]<br>Most <i>Euplotes</i> species in clade B [14]                                                                                                                                                                                                                                                                                                                                                                                                                                   |
| POH1 ( <i>E. woodruffi</i> )            | "Ca. <i>Bandiella numerosa</i> " sp. nov.<br>"Ca. <i>Protistobacter heckmanni</i> "                                                                        | <i>Alphaproteobacteria</i> , <i>Rickettsiales</i> , "Ca. <i>Midichloriaceae</i> "<br><i>Betaproteobacteria</i> , <i>Burkholderiales</i> , <i>Burkholderiaceae</i>                                                                                                                                                                | LR585348<br>FR873711                         | This publication<br>[14]                                         | banNum_173 [This publication]<br>Proti_445 [14]                    | 5'-CCTCTCGGCAATATACAGTA-3'<br>5'-ACCGAGATCGTTTGGTTC-3'                                | <i>Ciliates</i> [ <i>Euplotes</i> , <i>Ichthyophthirius</i> , <i>Paramecium</i> ], cnidarians [ <i>Hydra</i> ] [43]<br>Several <i>Euplotes</i> species in clade B [14]                                                                                                                                                                                                                                                                                                                                                       |
|                                         | "Ca. <i>Bandiella numerosa</i> " sp. nov.                                                                                                                  | <i>Alphaproteobacteria</i> , <i>Rickettsiales</i> , "Ca. <i>Midichloriaceae</i> "                                                                                                                                                                                                                                                | LR585349                                     | This publication                                                 | N/A                                                                | N/A                                                                                   | <i>E. woodruffi</i> , euglenids [ <i>Eutreptiella</i> ], cnidarians [ <i>Hydra</i> , <i>Montastrea</i> ], sponges [ <i>Cymbastela</i> ], echinoderms [ <i>Apostichopus</i> ] [This publication]                                                                                                                                                                                                                                                                                                                              |
| EMP ( <i>Euplotes</i> sp.)              | <i>Polynucleobacter</i> sp.<br>"Ca. <i>Megaira polyvenophila</i> "<br><i>CaeDimonas varicadens</i> ("Caedibacter varicadens")                              | <i>Betaproteobacteria</i> , <i>Burkholderiales</i> , <i>Burkholderiaceae</i><br><i>Alphaproteobacteria</i> , <i>Rickettsiales</i> , <i>Rickettsiaceae</i><br><i>Alphaproteobacteria</i> , <i>Holospirales</i> , <i>CaeDimonadaceae</i>                                                                                           | N/A<br>LR585350<br>LR585351                  | [14]<br>This publication<br>This publication                     | Poly_862 [13]<br>Rick_697 [24]<br>CC23a [64]                       | 5'-GGCTGACTTCACGGCTTA-3'<br>N/A<br>5'-TTCCACTTTGCTCTCTGG-3'                           | Most <i>Euplotes</i> species in clade B [14]<br><i>Ciliates</i> [ <i>Colpidium</i> , <i>Diaphrys</i> , <i>Euplotes</i> , <i>Ichthyophthirius</i> , <i>Paramecium</i> , <i>Spirostomum</i> ], green algae [ <i>Carteria</i> , <i>Mesostigma</i> , <i>Pleodorina</i> , <i>Volvox</i> ], diatoms [ <i>Hyalodiscus</i> ] [42]<br><i>E. woodruffi</i> , euglenids [ <i>Eutreptiella</i> ], cnidarians [ <i>Hydra</i> , <i>Montastrea</i> ], sponges [ <i>Cymbastela</i> ], echinoderms [ <i>Apostichopus</i> ] [This publication] |
| Fisp1.4 ( <i>E. platystoma -harpa</i> ) | "Ca. <i>Parafinniella ignota</i> " gen. nov., sp. nov.                                                                                                     | <i>Betaproteobacteria</i> , <i>Burkholderiales</i> , <i>Burkholderiaceae</i>                                                                                                                                                                                                                                                     | FR873728-30                                  | This publication                                                 | Paraf_838 [This publication]                                       | 5'-GATACAGAACTCCGCC-3'                                                                | <i>Euplotes</i> sp. [This publication]                                                                                                                                                                                                                                                                                                                                                                                                                                                                                       |
| Na2 ( <i>E. platystoma -harpa</i> )     | <i>Polynucleobacter</i> sp.                                                                                                                                | <i>Betaproteobacteria</i> , <i>Burkholderiales</i> , <i>Burkholderiaceae</i>                                                                                                                                                                                                                                                     | AJ585516                                     | [13]                                                             | Poly_862 [13]                                                      | 5'-GGCTGACTTCACGGCTTA-3'                                                              | Most <i>Euplotes</i> species in clade B [14]                                                                                                                                                                                                                                                                                                                                                                                                                                                                                 |
| LIV5 ( <i>E. magnificiratus</i> )       | "Ca. <i>Devosia symbiotica</i> "<br>"Ca. <i>Devosia euplotis</i> "<br><i>Francisella adelensis</i>                                                         | <i>Alphaproteobacteria</i> , <i>Rhizobiales</i> , <i>Hyphomicrobiaceae</i><br><i>Alphaproteobacteria</i> , <i>Rhizobiales</i> , <i>Hyphomicrobiaceae</i><br><i>Gammaproteobacteria</i> , <i>Thiotrichales</i> , <i>Francisellaceae</i>                                                                                           | LT898465<br>AJ548823<br>LR585352             | [18]<br>[25]<br>This publication                                 | DevNa_1026 [18]<br>DevEup993 [25]<br>Franci_199 [This publication] | 5'-GTGCCAGGTACCGGAAGTG-3'<br>5'-AAGTGCTCTGCTATGTC-3'<br>5'-CAGCAGCAAGTGCCAC-3'        | <i>E. platystoma</i> [18]<br><i>E. magnificiratus</i> [25]<br><i>E. petzi</i> [27], <i>E. magnificiratus</i> [This publication]<br><i>E. enigma</i> [This publication]                                                                                                                                                                                                                                                                                                                                                       |
| Ma52 ( <i>E. enigma</i> )               | <i>Devosia</i> sp.                                                                                                                                         | <i>Alphaproteobacteria</i> , <i>Rhizobiales</i> , <i>Hyphomicrobiaceae</i>                                                                                                                                                                                                                                                       | LR585353                                     | This publication                                                 | N/A                                                                | N/A                                                                                   |                                                                                                                                                                                                                                                                                                                                                                                                                                                                                                                              |

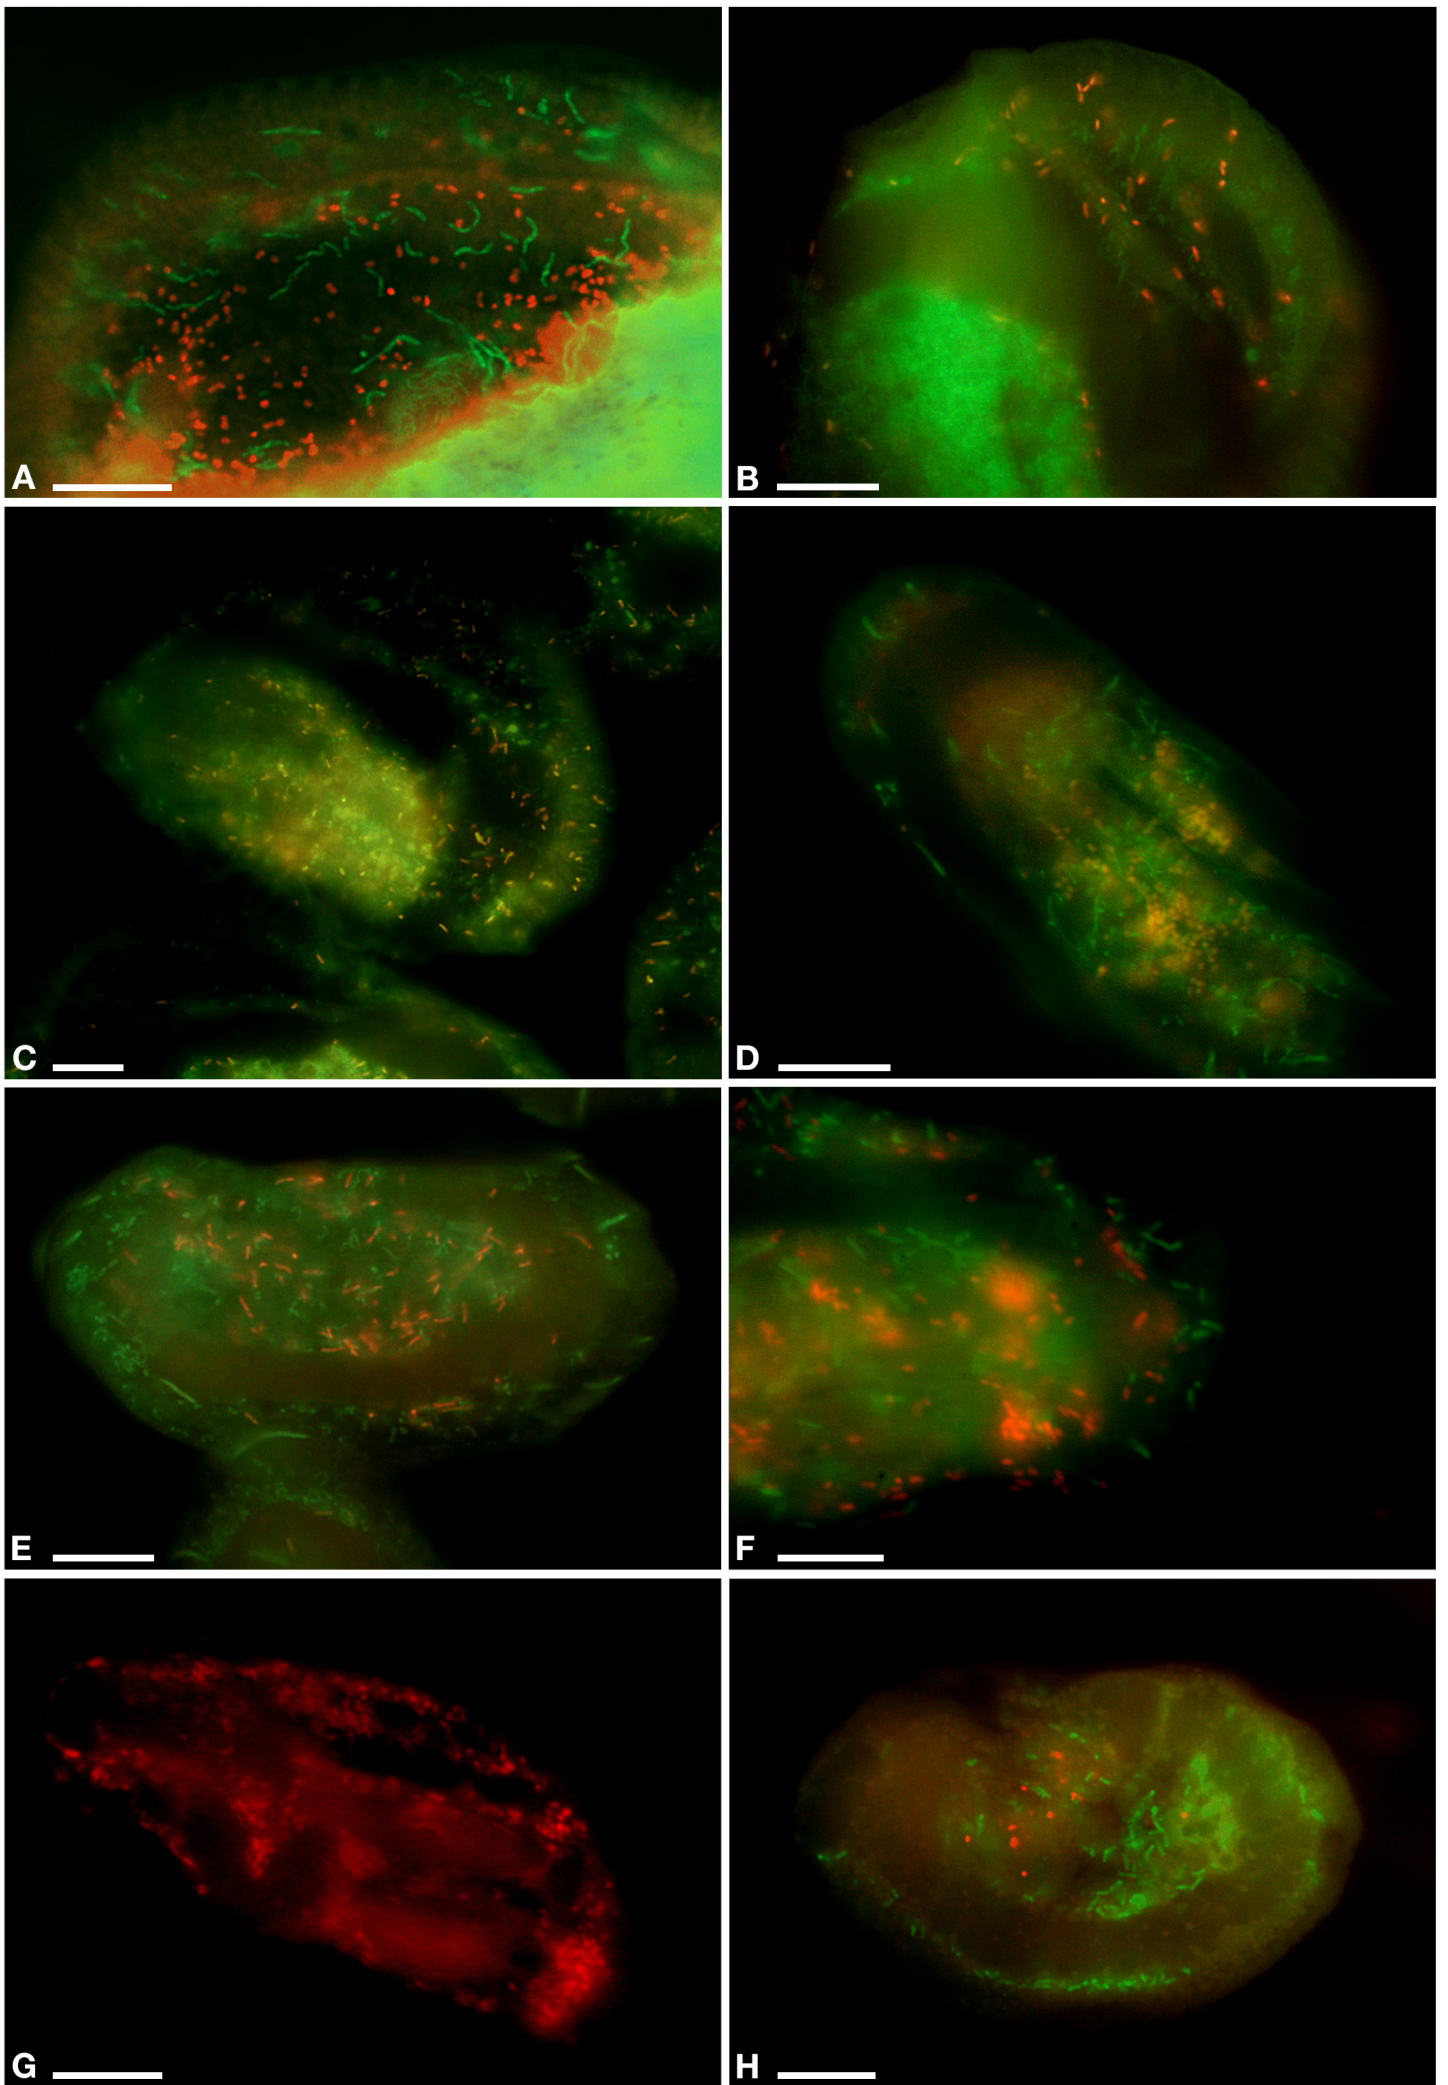

**Supplementary Figure S1. Additional fluorescent *in situ* hybridizations.** **A**, “*Ca. Protistobacter heckmanni*” (green, probe Proti\_445) and “*Ca. Nebulobacter yamunensis*” (red, probe NebProb203) in *E. aediculatus* Eae6. **B**, “*Ca. Cyrtobacter zanobii*” (orange, combination of the species-specific red probe CyrIn\_142 and the eubacterial green probe EUB338. Other bacteria are visible in green) in *E. aediculatus* Eae6. **C**, “*Ca. Cyrtobacter zanobii*” (orange, combination of the species-specific red probe CyrIn\_142 and the eubacterial green probe EUB338. Other bacteria are visible in green) in *E. aediculatus* Eae1. **D**, “*Ca. Megaira polyxenophila*” (orange, combination of the specific red probe MegPol436 and the alphaproteobacterial green probe ALF1b. Other alphaproteobacteria are visible in green) in *E. octocarinatus* Eoc1/2. **E**, “*Ca. Anadelfobacter sociabilis*” (orange, combination of the species-specific red probe Ana2\_436 and the eubacterial green probe EUB338. Other bacteria are visible in green) in *E. octocarinatus* Eoc1/2. **F**, “*Ca. Megaira polyxenophila*” (green, *Rickettsiaceae* probe Rick\_697) and “*Ca. Parafinniella ignota*” (red, species-specific probe Paraf\_838) in *Euplotes* sp. EMP. **G**, *Caedimonas varicaedens* (red, species-specific probe CC23a) in *Euplotes* sp. EMP. **H**, *Francisella adeliensis* (red, species-specific probe Franci\_199) and “*Ca. Devosia euplotis*” (green, species-specific probe DevEup993). Red signals are produced by the Cy3 dye; green signals by the fluorescein, FITC, or Alexa488 dyes. Bars represent 10  $\mu\text{m}$ .

## Supplementary Text S1

### Formal descriptions of new bacterial taxa belonging to the family “*Ca. Midichloriaceae*” (*Rickettsiales*, *Alphaproteobacteria*)

#### Description of “*Candidatus Anadelfobacter sociabilis*” sp. nov.

*Anadelfobacter sociabilis* (A.na.de.lfo.bac'ter so.ci.a'bi.lis; N.L. adj. *sociabilis*, sociable, referring to its co-occurrence with other endosymbionts)

Rod-shaped bacterium, about 1.9 µm in length. Endosymbiont living in the cytoplasm of the ciliate *Euplotes octocarinatus* (Ciliophora, Spirotrichea), identified in strains collected in Italy and the USA. Basis of assignment: 16S rRNA gene sequence (accession number: LR585342) and positive match with the oligonucleotide probe Ana2\_436 (5'-CATTATTTTCCCCACTAAAAG-3').

#### Description of “*Candidatus Bandiella numerosa*” sp. nov.

*Bandiella numerosa* (Ban.di.el'la nu.me.ro'sa; N.L. adj. *numerosus*, abundant, referring to the high number of cells of this bacterium in each host cell)

Rod-shaped bacterium, about 1.7 µm in length. Endosymbiont observed in the cytoplasm of the ciliate *Euplotes woodruffi* (Ciliophora, Spirotrichea), identified in strains collected in Italy and the USA (Hawaii). Basis of assignment: 16S rRNA gene sequence (accession number: LR585348) and positive match with the oligonucleotide probe BanNum\_173 (5'-CCTCTCGGCAATATACAGTA-3').

#### Description of “*Candidatus Euplotella sexta*” gen. nov., sp. nov.

*Euplotella sexta* (Eu.plo.tel'la sex.ta; N.L. fem. n. *Euplotella*, referring to the host, *Euplotes*; N.L. adj. *sextus*, sixth, since it was the sixth symbiont discovered in its *Euplotes* host population)

Rod-shaped bacterium, about 2.2 µm in length. Endosymbiont living in the cytoplasm of the ciliate *Euplotes octocarinatus* (Ciliophora, Spirotrichea), identified in a population collected in Italy. Basis of assignment: 16S rRNA gene sequence (accession number: LR585343) and positive match with the oligonucleotide probe EocBan\_828 (5'-AACCTCGGTCCCGACACC-3').

### Formal descriptions of new bacterial taxa belonging to the order *Holosporales* (*Alphaproteobacteria*)

#### Description of “*Candidatus Fujishimia apicalis*” gen. nov., sp. nov.

*Fujishimia apicalis* (Fu.ji.shi'mia a.pi.ca'lis; N.L. fem. n. *Fujishimia*, in honor of Professor Masahiro Fujishima, one of the pioneers in the study of *Holosporales*; N.L. adj. *apicalis*, apical, related to the most common position the bacterium occupies in the host cell)

Coccoid bacterium, about 0.55 µm in length. Endosymbiont living in the cytoplasm of the ciliate *Euplotes octocarinatus* (Ciliophora, Spirotrichea), identified in a population collected in Italy. Preferentially distributed in the marginal, especially apical, parts of the host cell. Not always observed in all *Euplotes* cells of the same culture. Basis of assignment: 16S rRNA gene sequence

(accession number: LR585344) and positive match with the oligonucleotide probe Fuji\_838 (5'-GCTCTCCTAAAAGGATGC-3').

**Description of “*Candidatus Finniella dimorpha*” sp. nov.**

*Finniella dimorpha* (Fin.ni.el'la di.mor'pha; N.L. adj. *dimorphus*, with two forms, related to the dimorphic morphology of the bacterium)

Rod-shaped bacterium, endosymbiont living in the cytoplasm of the ciliates *Euplotes daidaleos*, *Euplotes eurystomus*, and *Euplotes octocarinatus* (Ciliophora, Spirotrichea), identified in host strains and populations collected in Italy. In *E. daidaleos*, observed in two distinct forms of approximately the same diameter but different lengths, 1.7 µm vs. 15-25 µm, respectively. Basis of assignment: 16S rRNA gene sequence (accession number: LR585336) and positive match with the oligonucleotide probe Fin\_1025 (5'-GTGGACGCCAGCCAAACT-3').

**Description of “*Candidatus Parafinniella ignota*” gen. nov. sp. nov.**

*Parafinniella ignota* (Pa.ra.fin.ni.el'la ig.no'ta; N.L. fem. n. *Parafinniella*, similar to *Finniella*; N.L. adj. *ignotus*, unknown, mysterious)

Rod-shaped bacterium, about 1.3 µm in length. Endosymbiont living in the cytoplasm of the Italian population EMP belonging to the ciliate genus *Euplotes* (Ciliophora, Spirotrichea). Basis of assignment: 16S rRNA gene sequence (accession number: FR873728-30) and positive match with the oligonucleotide probe Paraf\_838 (5'-AACCTCGGTCCCGACACC-3').

## Supplementary Text S2

### Synopsis of the known bacterial symbionts of *Euplotes*.

*Betaproteobacteria* Garrity et al 2006

*Burkholderiales* Garrity et al 2006

*Burkholderiaceae* Garrity et al 2006

***Polynucleobacter*** Heckmann and Schmidt 1987

All *Euplotes* species in clade B live in freshwater or low-salinity aquatic environments and depend on essential intracellular bacteria. An ancient symbiotic event must hence have taken place in an ancestor of the clade. Since elongated, multiple-nucleoid *Polynucleobacter* occur in most clade B *Euplotes* species [12,15], they were long assumed to be ancestral mutualists co-evolving with their hosts in the fashion of aphids and *Buchnera* [65]. Recent environmental microbiology and genomic developments have however painted a more intriguing scenario. Most *Polynucleobacter* are in fact free-living, small, pleomorphic bacteria, common and abundant in freshwater bacterioplankton [16,66]. Conversely, extant symbiotic *Polynucleobacter* are products of multiple independent establishments of the symbiosis [17], coopted by *Euplotes* to perform some unknown function they may be pre-adapted for. During each acquisition, a previous symbiont (either another *Polynucleobacter* or a different bacterium) is replaced, arguably because it has lost too many genes to the process of genome erosion [7], and quickly dispatched (no multiple essential strains have ever been observed in the same host). This process must happen at a relatively high frequency, considering the low level of degeneration observed in symbiotic *Polynucleobacter* [17,67] compared to genuinely ancient symbionts [e.g. 68]. It certainly happens faster than the average speciation time of *Euplotes*, since certain species (such as *E. aediculatus*) are associated to multiple symbiotic lineages [17]. Strains sharing identical 16S rRNA gene sequence have never been found in different host species [14], also supporting the idea that *Polynucleobacter* cannot be horizontally transmitted (although they can be artificially transfected between hosts [12]). *Euplotes* is an evolutionary dead-end for its symbionts, so it is difficult to consider their relationship a mutualism, even if the partners depend on each other for survival. *Polynucleobacter* are recent symbionts in an old symbiotic system, the purpose of which remains a mystery.

**“*Ca. Protistobacter*”** Vannini et al 2013

“*Ca. Protistobacter heckmanni*”, the only species in the genus, was the second essential symbiont identified in *Euplotes* species of clade B [14,19]. It belongs to the same family as *Polynucleobacter* and it is functionally equivalent for the host, although transfection experiments have produced mixed results [69]. It differs from *Polynucleobacter* for the lack of multiple nucleoids and a slightly larger genome size (estimated by pulsed field electrophoresis [19]). “*Ca. Protistobacter*” is currently only known from *Euplotes*, and it is far less common than *Polynucleobacter*. It has been detected in strains of *E. eurytomus*, *E. octocarinatus*, *E. woodruffi* and, in this paper, *E. aediculatus*, but it can probably occur in most or all clade B species. In the absence of known close free-living

relatives, “*Ca. Protistobacter*” has been speculated to be the ancestral symbiont of clade B, replaced on multiple occasions by *Polynucleobacter* [14].

*Alphaproteobacteria* Garrity et al 2006

*Rhizobiales* Kuykendall 2006

*Hyphomicrobiaceae* Babudieri 1950

***Devosia*** Nakagawa et al 1996

*Devosia* is a large genus of bacteria occurring mostly (but not exclusively) in soil environments [e.g. 70]. Almost all species are free-living or associated to plants, and can be easily cultivated under standard lab conditions [e.g. 71]. The exception is represented by *Devosia* harbored by *Euplotes*. “*Ca. Devosia symbiotica*” has been found in a single strain of *E. platystoma*, a clade B *Euplotes* species, where it is ecologically analogous to *Polynucleobacter* and “*Ca. Protistobacter*”: it is an obligate and essential symbiont that cannot survive outside its host and is required for host survival [18]. The closely related “*Ca. Devosia euplotis*” performs the same role in all investigated *E. magnicirratu*s, a species in clade A that represents the only known example of a marine *Euplotes* with essential symbiotic bacteria [25]. We have here recovered a third *Devosia* lineage in a strain of *E. enigma*, a clade A marine *Euplotes* that is not closely related to *E. magnicirratu*s [10]. Unfortunately, we were unable to confirm the symbiotic status of this uncultured *Devosia* with FISH experiments. Our finding does however corroborate the existence of a clade of *Devosia* associated with various *Euplotes* species. Genome analyses of symbiotic *Devosia* might tell us if these bacteria independently infected ciliates due to shared pre-adaptations, possibly replacing older symbionts like *Polynucleobacter* often does, or if they represent instead the remnants of an ancestral symbiotic event predating the split between clade A and clade B of *Euplotes*.

*Rickettsiales* Gieszczykiewicz 1939

*Rickettsiaceae* Pinkerton 1936

**“*Ca. Megaira*”** Schrällhammer et al 2013

The genus “*Ca. Megaira*” was first observed in ciliates [23], but related uncultured bacteria already suggested a wider host range, later confirmed by further surveys [42]. “*Ca. Megaira polyxenophila*”, associated with several ciliates and algae, was previously detected in *E. octocarinatus*, and we confirmed here its presence in *E. eurystomus* and another undescribed *Euplotes* species of clade B. “*Ca. Megaira venefica*”, a symbiont also found in *Paramecium* and possibly the hydrozoan *Hydra* [42], has been reported here for the first time in *Euplotes* (*E. woodruffi*). “*Ca. Megaira*” can coexist with both *Polynucleobacter* and “*Ca. Protistobacter*”, but it is never the only accessory symbiont in investigated *Euplotes*, being instead part of larger alphaproteobacterial communities. Host range proves that “*Ca. Megaira*” is capable of horizontal transmission, at least over evolutionary times, and it is possible that the *Euplotes* strains harboring “*Ca. Megaira*” are the ones that are more prone to be colonized by bacteria. It is also true that “*Ca. Megaira*” seems to be fairly stable within its hosts over years, and it is generally present in all inspected host cells. Hence, there is currently no evidence for any harmful effect on its host.



**“Ca. Trichorickettsia” Vannini et al 2014**

The flagellated rickettsiae “Ca. Trichorickettsia” and “Ca. Gigarickettsia”, characterized by a combination of flagella, flagellar motility, and/or capsid-like particles in their cytoplasm, were originally described in ciliates of the genera *Paramecium*, *Spirostomum*, and *Euplotes* [24]. “Ca. Trichorickettsia mobilis” was detected in a single *E. aediculatus* population harboring at least three accessory symbionts in addition to *Polynucleobacter*. Despite sharing a virtually identical 16S rRNA gene sequence with conspecific strains, the “Ca. Trichorickettsia” in *Euplotes* was atypical, lacking obvious flagella or capsid-like particles, suggesting that both features are either strain- or condition-specific (a condition possibly shared with “Ca. Megaira venefica” [42]).

**“Ca. Midichloriaceae” Bandi et al 2013**

**“Ca. Anadelfobacter” Vannini et al 2010**

“Ca. Anadelfobacter veles” was originally described as the only accessory symbiont of an *E. platystoma* (=“harpa”) strain harboring *Polynucleobacter* [20]. “Ca. Anadelfobacter sociabilis”, described here, was found in two strains of *E. octocarinatus*, one associated to *Polynucleobacter* and the other to “Ca. Protistobacter”, both harboring additional accessory alphaproteobacteria.

**“Ca. Cyrtobacter” Vannini et al 2010**

“Ca. Cyrtobacter comes” was originally described in an *E. platystoma* (=“harpa”) strain harboring *Polynucleobacter* [20]. The closely related “Ca. Cyrtobacter zanobii” was originally described in *E. aediculatus* [22] and it has been detected in two more strains of the same species here. Its distribution coincides with that of the gammaproteobacterium “Ca. Nebulobacter yamunensis” (see below). A third species was detected in a metagenomic screening of one *E. eurystomus* population, but it is not formally established in the absence of a confirmatory FISH result.

**“Ca. Bandiella” Senra et al 2016**

“Ca. Bandiella woodruffi” was originally described in *E. woodruffi* [44]. A related bacterial species, “Ca. Bandiella numerosa”, is reported here in two additional *E. woodruffi* strains (one harboring *Polynucleobacter* and one “Ca. Protistobacter”). This does not necessarily imply a high degree of host specificity for “Ca. Bandiella”, since closely related environmental sequences are associated to freshwater and marine cnidarians and other invertebrates. Like other representatives of *Rickettsiales*, “Ca. Bandiella” probably has some infectious capabilities. “Ca. Bandiella woodruffi” is the only *Euplotes* accessory symbiont where these abilities have been experimentally tested [44]: “Ca. Bandiella” could infect other strains of *Euplotes* in culture, but was quickly eradicated from them once the source host was removed, suggesting some mechanism of suppression from the ciliate. In natural *E. woodruffi* hosts, however, both species of “Ca. Bandiella” are found in high numbers and in every cell.

**“Ca. Euplotella” Boscaro et al 2019, gen. nov.**

“Ca. Euplotella sexta”, described here in an *E. octocarinatus* harboring *Polynucleobacter* and five accessory alphaproteobacteria, is a large, elongated and slightly curved rod-shaped bacterium. It is present in all inspected cells of its host, but

in relatively low numbers, probably due to its considerable size (and the presence of several other bacteria in the cytoplasm of the same host).

*Holosporales* Szokoli et al 2016

*Holosporaceae* Görtz & Schmidt 2006

**“*Ca. Fujishimia*”** Boscaro et al 2019, gen. nov.

The family *Holosporaceae* has been defined in many different ways [e.g. 72-74], but its core representatives are nuclear symbionts of peniculid ciliates (mainly *Paramecium*) characterized by a morphologically differentiated infectious stage. Beside the four genera that show this conspicuous synapomorphy (*Holospora* [75], “*Ca. Gortzia*” [72], “*Ca. Hafkinia*” [76] and “*Ca. Preeria*” [77]), several other taxa have been assigned to the family, some of which are also symbionts of ciliates (e.g. “*Ca. Paraholospora*” in *Paramecium sexaurelia*, which shuttles between the nucleus and the cytoplasm [78]) or other protists (e.g. “*Ca. Cytomitobacter*” in the diplonemid *Diplonema* [79]). Not much is known about the non-core *Holosporaceae*. The first representative in *Euplotes* is “*Ca. Fujishimia apicalis*” described here, detected in a single population of *E. octocarinatus* together with *Polynucleobacter* and four other alphaproteobacteria. Although we have no information yet on the biology of this bacterium, its coccoid shape and diminutive size (about 0.5 µm) stand out. “*Ca. Fujishimia*” is not distributed throughout most of the cytoplasm, but tends to be concentrated in localized areas at the margin of host cells, often in an anterior position. Additionally, “*Ca. Fujishimia*” is one of the few alphaproteobacterial symbionts of *Euplotes* that is not present in all cells of the host population, a characteristic shared with *Holospora* and allied genera that might suggest a parasitic, or at least infectious, lifestyle.

*Paracaedibacteraceae* Hess et al 2016

**“*Ca. Finniella*”** Hess et al 2016

“*Ca. Finniella*” was first described in the cytoplasm of amoeboflagellate viridiraptorids (Rhizaria, Cercozoa) [41]. Different viridiraptorid species harbored genotypically different symbionts, classified in two separate species (“*Ca. Finniella inopinata*” in *Viridiraptor invadens* and “*Ca. Finniella lucida*” in *Orciraptor agilis*). Not all strains of the host species harbored the bacteria, but all cells in infected strains did. “*Ca. Finniella*” did not disappear during starvation, suggesting some stability in the symbiosis. “*Ca. Finniella dimorpha*”, described in this paper, is the first species of the genus described in *Euplotes*, specifically *E. daidaleos*, *E. eury stomus*, and *E. octocarinatus*. “*Ca. Finniella dimorpha*” was found with both *Polynucleobacter* and “*Ca. Protistobacter*”, and either as the only accessory symbiont or as part of a larger community of alphaproteobacteria. The most striking feature of “*Ca. Finniella dimorpha*” in *E. daidaleos* Eda1 is the presence of two very different morphotypes in some of the host cells: long thread-like bacteria, up to a third of the host’s length, can be seen in addition to the smaller rod-like bacteria, that are the only form present in some other host cells. Elongated morphotypes are known for a few bacterial symbionts [e.g. 80] and often originate from incomplete cell division, either as a physiological aspect of the cell cycle or due to host-induced inhibition [81,82]. The presence of “*Ca. Finniella dimorpha*” in all inspected cells of Eda1 does not, however, suggest any kind of antagonistic interaction.

**“Ca. Parafinniella”** Boscaro et al 2019, gen. nov.

“Ca. Parafinniella ignota” is reported here for a population of an unclassified clade B *Euplotes* additionally harboring *Polynucleobacter* and three other accessory alphaproteobacteria. Not much is currently known about this bacterium, but it is present in fairly high numbers in the cytoplasm of all cells in the host population.

*Caedimonadaceae* Schrallhammer et al 2018

***Caedimonas*** Schrallhammer et al 2018

One of the most unusual phenomena discovered by pioneer researchers working on ciliate endosymbionts was the “killer trait” conferred by some endosymbiotic bacteria to their *Paramecium* hosts [83,84]. Each “killer symbiont” produces one “R-body”, a tightly coiled proteinaceous ribbon that springs open when the bacterium is ingested by a *Paramecium* that is not its natural host, puncturing the digestive vacuole and releasing lethal toxins [85]. Host strains poison their surroundings by exocytosing their symbionts, killing potential congeneric competitors [86]. It was later realized that R-body-containing bacteria are not related to each other [87], and that the trait can be horizontally transmitted. *Caedimonas varicaedens*, reported in multiple *Paramecium* species and the dinoflagellate *Peridinium cinctum*, belongs to *Holosporales*, and it has been found here in *Euplotes* sp. EMP, a clade B population harboring *Polynucleobacter* as the essential symbiont. It is located in the cytoplasm, as is the case in *Peridinium* and some *Paramecium* (but not others, where it resides in the macronucleus) [29]. It is not known if the *Caedimonas* in *Euplotes* can confer the killer trait to its host. Since this is not the case for *Peridinium* [85], it is possible that either the presence of R-bodies or the killing phenotype is only present in strains harbored by *Paramecium*. More functional studies are needed, and a comparison between *C. varicaedens* in different hosts may provide valuable insights into the biology of the killers.

*Gammaproteobacteria* Garrity et al 2005

*Thiotrichales* Garrity et al 2005

*Francisellaceae* Sjöstedt 2005

***Francisella*** Dorofe'ev 1947

The genus *Francisella* is comparatively well-known because some of its representatives are pathogenic in mammals (*Francisella tularensis* is the causative agent of tularemia) [88,89] and farmed sea animals [90]. *Francisella* is usually an intracellular opportunist (i.e., a facultative symbiont) [88]. In *Euplotes*, it was originally reported in the marine *Euplotes raikovi* (clade C) as the subspecies *Francisella noatunensis endociliophora* [26], later established as its own separate species. Another species, *Francisella adeliensis*, has recently been found associated with the Antarctic *Euplotes petzi* (clade E) [27]. Alongside *Polynucleobacter*, these two *Francisella* are the only *Euplotes* symbionts whose genome has been sequenced [27,91]. Another strain of *F. adeliensis* has been detected here in a marine *Euplotes magnicirratus* (clade A), suggesting that the genus *Francisella* is widespread in marine *Euplotes*. As is the case for *Rickettsiales* and *Holosporales*, however, the phylogeny of the bacteria rules out any ancient relationship or co-evolution with the host. It is even possible that *Francisella* are just “accidental” infections, and not long term symbionts, considering how they differ from most other

bacteria described here in having very low density within host cell, being usually distributed in small “clumps” in the *Euplotes* cytoplasm instead of evenly spread, and being able to grow outside the host.

*Fastidiosibacteraceae* Xiao et al 2018

“*Ca. Nebulobacter*” Boscaro et al 2012

“*Ca. Nebulobacter yamunensis*” was first described in *E. aediculatus* [21], and cultivation attempts showed that it either cannot grow outside *Euplotes* or it has very specific nutritional requirements. Two novel “*Ca. Nebulobacter*” strains with identical 16S rRNA gene sequence are reported here. All “*Ca. Nebulobacter*” strains were found in *E. aediculatus* harboring either *Polynucleobacter* or “*Ca. Protistobacter*” and the accessory alphaproteobacterium “*Ca. Cyrtobacter zanobii*”. If further confirmed, this might provide useful clues on the biology of both organisms as well as their relationship with the host. Recently, a bacterium differing from “*Ca. Nebulobacter yamunensis*” by a single-nucleotide in the 16S rRNA gene sequence has been described as *Fastidiosibacter lacustris* [92]. The paper makes no mention of “*Ca. Nebulobacter*”, despite the fact that sequence similarity would not warrant the establishment of two separate genera. We maintain here the older name for the symbiont, acknowledging that some taxonomic clarification might be needed in the future. Regardless, it is extremely interesting that *F. lacustris* can be maintained in pure culture, although with difficulty. The existence of very closely related free-living and obligate symbiont strains could mirror the case of *Polynucleobacter* and provide a second, possibly independent case-study to investigate recent symbioses in the same host.

*Uncertain and unclassified.*

“*Ca. Endonucleariobacter rarus*” was described in a population of the opisthokont amoeba *Nuclearia* that also harbored betaproteobacterial ectosymbionts [43]. “*Ca. Endonucleariobacter*” is not currently known from any other host, but a closely related 16S rRNA gene sequence has been detected here in a metagenomic screening of *E. eurytomus*. The result could not be validated by FISH, so it is not confirmed if a different species of “*Ca. Endonucleariobacter*” is an accessory symbiont in ciliates, instead of a free-living bacterium present in our cultures. Similarly, a betaproteobacterial sequence affiliated to family *Comamonadaceae* was previously reported from the *Polynucleobacter*-harboring unclassified *Euplotes* strain PUHP (clade B), but never confirmed by FISH [14]. It was considered a putative symbiont based on the fact that the signal from betaproteobacterial fluorescent probes did not completely overlap that of the *Polynucleobacter* probe, suggesting the presence of an additional betaproteobacterium in the ciliate cytoplasm. However, without a sequence-specific hybridization and considering that *Comamonadaceae* are fairly common in the environment, we consider the status of this bacterium dubious. Finally, it is worth mentioning that several reports of endosymbiotic bacteria in marine and freshwater *Euplotes* predate molecular techniques [reviewed in 93]. As it was customary at the time, many were classified using letters instead of binomial names (*Polynucleobacter* was originally “omicron”). The “epsilon” symbionts of *Euplotes minuta*, a marine species in clade A, were associated with a killer trait of the host reminiscent of that observed in *Paramecium* [94]. “Eta” [95] and “B1” [96] symbionts

apparently conferred a similar feature to another marine species, *Euplotes crassus*. A different strain of *E. crassus* is also the only reported case of *Euplotes* symbionts harbored in the macronucleus instead of the cytoplasm [50]. Other bacteria were only observed in electron microscopy sections, and no function was ever assigned to them. Many were observed in *Euplotes* clade B species in addition to the easily recognizable *Polynucleobacter* [12]. We know now that these accessory bacteria might have belonged to any number of various groups.

## Additional References

63. Hahn MW, Pöckl M, Wu QL. 2005 Low intraspecific diversity in a *Polynucleobacter* subcluster population numerically dominating bacterioplankton of a freshwater pond. *Appl. Env. Microbiol.* 71, 4539-4547
64. Springer N, Ludwig W, Amann R, Schmidt HJ, Görtz H-D, Schleifer K-H. 1993 Occurrence of fragmented 16S rRNA in an obligate bacterial endosymbiont of *Paramecium caudatum*. *Proc. Natl. Acad. Sci. U. S. A.* 90, 9892-9895
65. Meseguer AS, Manzano-Marín A, Cour d'Acier A, Clamens A-L, Godefroid M, Jousselin E. 2016 *Buchnera* has changed flatmate but the repeated replacement of co-obligate symbionts is not associated with the ecological expansions of their aphid hosts. *Mol. Ecol.* 26, 2363-2378
66. Hahn MW, Koll U, Jezberová J, Camacho A. 2015 Global phylogeography of pelagic *Polynucleobacter* bacteria: restricted geographic distribution of subgroups, isolation by distance and influence of climate. *Environ. Microbiol.* 17, 829-840
67. Vannini C, Pöckl M, Petroni G, Wu QL, Lang E, Stackebrandt E, Schrällhammer M, Richardson PM, Hahn MW. 2007 Endosymbiosis in statu nascendi: close phylogenetic relationship between obligately endosymbiotic and obligately free-living *Polynucleobacter* strains (*Betaproteobacteria*). *Environ. Microbiol.* 9, 347-359
68. Bennett GM, Moran NA. Small, Smaller, Smallest: The origins and evolution of ancient dual symbioses in a phloem-feeding insect. *Genome Biol. Evol.* 5, 1675-1688
69. Vannini C, Sigona C, Hahn M, Petroni G, Fujishima M. 2017 High degree of specificity in the association between symbiotic betaproteobacteria and the host *Euplotes* (Ciliophora, Euplotia). *Eur. J. Protistol.* 59, 124-132
70. Ryu SH, Chung BS, Le NT, Jang HH, Yun P-Y, Park W, Jeon CO. 2008 *Devosia geojensis* sp. nov., isolated from diesel-contaminated soil in Korea. *Int. J. Syst. Evol. Microbiol.* 58, 633-636
71. Bautista VV, Monslaud RG, Yokota A. 2010 *Devosia yakushimensis* sp. nov., isolated from root nodules of *Pueraria lobata* (Willd.) Ohwi. *Int. J. Syst. Evol. Microbiol.* 60, 627-632
72. Boscaro V, Fokin SI, Schrällhammer M, Schweikert M, Petroni G. 2012 Revised systematics of *Holospora*-like bacteria and characterization of “*Candidatus* Gortzia infectiva”, a novel macronuclear symbiont of *Paramecium jenningsi*. *Microb. Ecol.* 65, 255-267
73. Szokoli F, Castelli M, Sabaneyeva E, Schrällhammer M, Krenek S, Doak TG, Berendonk TU, Petroni G. 2016 Disentangling the taxonomy of *Rickettsiales* and description of two novel symbionts (“*Candidatus* Bealeia paramacronuclearis” and “*Candidatus* Fokinia cryptica”) sharing the cytoplasm of the ciliate protist *Paramecium biaurelia*. *Appl. Environ. Microbiol.* 82, 7236-7247
74. Muñoz-Gómez SA, Hess S, Burger G, Lang BF, Susko E, Slamovits CH, Roger AJ. 2019 An updated phylogeny of the *Alphaproteobacteria* reveals that the parasitic *Rickettsiales* and *Holosporales* have independent origins. *eLife* 8, e42535
75. Gromov BV, Ossipov DV. 1981 *Holospora* (ex Hafkine 1890) nom. rev., a genus of bacteria inhabiting the nuclei of paramecia. *Int. J. Syst. Bacteriol.* 31, 348-352
76. Fokin SI, Serra V, Ferrantini F, Modeo L, Petroni G. 2019 “*Candidatus* Hafkinia simulans” gen. nov., sp. nov., a novel *Holospora*-like bacterium from the macronucleus

of the rare brackish water ciliate *Frontonia salmastra* (Oligohymenophorea, Ciliophora): multidisciplinary characterization of the new endosymbiont and its host. *Microb. Ecol.* 77, 1092-1106

77. Potekhin A, Schweikert M, Nekrasova I, Vitali V, Schwarzer S, Anikina A, Kaltz O, Petroni G, Schrällhammer M. 2018 Complex life cycle, broad host range and adaptation strategy of the intranuclear *Paramecium* symbiont *Preeria caryophila* comb. nov. *FEMS Microbiol. Ecol.* 94. doi: 10.1093/femsec/fiy076
78. Eschbach E, Pfannkuchen M, Schweikert M, Drutschmann D, Brümmer F, Fokin S, Ludwig W, Görtz H-D. 2009 “*Candidatus Paraholospora nucleivisitans*”, an intracellular bacterium in *Paramecium sexaurelia* shuttles between the cytoplasm and the nucleus of its host. *Syst. Appl. Microbiol.* 32, 490-500
79. Tashyreva D, Prokopchuk G, Votýpka J, Yabuki A, Horák A, Lukeš J. 2018 Life cycle, ultrastructure, and phylogeny of new diplomonads and their endosymbiotic bacteria. *mBio* 9, e02447-17
80. Hirota B, Okude G, Anbutsu H, Futahashi R, Moriyama M, Meng X-Y, Nikoh N, Koga R, Fukatsu T. 2017 A novel, extremely elongated, and endocellular bacterial symbiont supports cuticle formation of a grain pest beetle. *mBio* 8, e01482
81. Login FH, Balmand S, Vallier A, Vincent-Monégat C, Vigneron A, Weiss-Gayet M, Rochat D, Heddi A. 2011 Antimicrobial peptides keep insect endosymbionts under control. *Science* 334, 362-365
82. Catta-Preta CMC, Brum FL, da Silva CC, Zuma AA, Elias MC, de Souza W, Schenkman S, Motta MCM. 2015 Endosymbiosis in trypanosomatid protozoa: the bacterium division is controlled during the host cell cycle. *Front. Microbiol.* 6, 520
83. Sonneborn TM. 1943 Gene and cytoplasm. I. The determination and inheritance of the killer character in variety 4 of *Paramecium aurelia*. *Proc. Natl. Acad. Sci. U. S. A.* 29, 329-338
84. Preer JR, Stark P. 1953 Cytological observations on the cytoplasmic factor “kappa” in *Paramecium aurelia*. *Exp. Cell Res.* 5, 478-499
85. Schrällhammer M, Schweikert M. 2009 The killer effect of *Paramecium* and its causative agents. In *Endosymbiosis in Paramecium*. Münster: Microbiology Monograph.
86. Kusch J, Czubatsinski L, Wegmann S, Hübner M, Alter M, Albrecht P. 2002 Competitive advantages of *Caedibacter*-infected paramecia. *Protist* 153, 47-58
87. Beier CL, Horn M, Michel R, Schweikert M, Görtz H-D, Wagner M. 2002 The genus *Caedibacter* comprises endosymbionts of *Paramecium* spp. related to the *Rickettsiales* (*Alphaproteobacteria*) and to *Francisella tularensis* (*Gammaproteobacteria*). *Appl. Environ. Microbiol.* 68, 6043-6050
88. Sjöstedt AB. 2005 *Francisellaceae* fam. nov. In *Bergey's Manual of Systematic Bacteriology, Second Edition*. New York: Springer-Verlag
89. Pilo P. 2018 Phylogenetic lineages of *Francisella tularensis* in animals. *Front. Cell. Infect. Microbiol.* 8, 258
90. Colquhoun DJ, Duodu S. 2011 *Francisella* infections in farmed and wild aquatic organisms. *Vet. Res.* 42, 47
91. Sjödin A, Öhrman C, Bäckman, Lärkeryd A, Granberg M, Lundmark E, Karlsson E, Nilsson E, Vallesi A, Tellgren-Roth C *et al.* 2014 Complete genome sequence of *Francisella endociliophora* strain FSC1006, isolated from a laboratory culture of the marine ciliate *Euplotes raikovi*. *Genome A.* 2, e01227-14

92. Xiao M, Salam N, Liu L, Jiao J-Y, Zheng M-L, Wang J, Li S, Chen C, Li W-J, Qu P-H. 2018 *Fastidiosibacter lacustris* gen. nov., sp. nov., isolated from a lake water sample, and proposal of *Fastidiosibacteraceae* fam. nov. within the order *Thiotrichales*. *Int. J. Syst. Evol. Microbiol.* 68, 347-352
93. Görtz H-D. 2006 Symbiotic associations between ciliates and prokaryotes. In *The Prokaryotes, Third Edition*. New York: Springer-Verlag
94. Heckmann K, Preer JR, Straetling WH. 1967 Cytoplasmic particles in the killers of *Euplotes minuta* and their relationship to the killer substance. *J. Protozool.* 14, 360-363
95. Nobili R, Rosati G, Verni F. 1976 The killer trait in *Euplotes crassus* (Ciliata, Hypotrichida). *Boll. Zool.* 43, 251-258
96. Dini F, Luporini P. 1982 The inheritance of the mate-killer trait in *Euplotes crassus* (Hypotrichida, Ciliophora). *Protistologica* 18, 179-184
